# Supplementary material
Source: publisher site journal article supplement (https://www.dovepress.com/article/381052)
Supplement: Supplementary file 1 [file get_supplementary_file.php]

Supplementary Table 1 Baseline clinical features of diabetic kidney disease patients

| Variables | All | Slow decliners | Rapid decliners | *p-*value |
| --- | --- | --- | --- | --- |
|  | (n = 191) | (n = 95) | (n = 96) |  |
| Male gender, *n* (%) | 133 (69.6) | 67 (70.5) | 66 (68.8) | 0.79 |
| Age (years) | 50.5 ± 10.3 | 52.5 ± 9.7 | 48.6 ± 10.6 | 0.009 |
| Body mass index (kg/m2) | 25.84 ± 3.78 | 25.92 ± 3.52 | 25.72 ± 4.15 | 0.743 |
| Current Smoker, *n* (%) | 95 (49.7) | 51 (53.7) | 44 (45.8) | 0.363 |
| Hypertension, *n* (%) | 163 (85.3) | 78 (82.1) | 85 (88.5) | 0.209 |
| Systolic blood pressure (mmHg) | 145 ± 24 | 145 ± 24 | 145 ± 25 | 0.908 |
| Diastolic blood pressure (mmHg) | 86 ± 13 | 86 ± 13 | 86 ± 13 | 0.94 |
| Diabetic duration (months) | 96 [36, 144] | 84 [36, 132] | 108 [53, 144] | 0.312 |
| Diabetic retinopathy, *n* (%) | 99 (52.4) | 46 (49.5) | 53 (55.2) | 0.429 |
| Fasting blood glucose (mmol/L) | 7.0 [5.5, 9.3] | 6.6 [5.6, 9.1] | 7.4 [5.4, 9.7] | 0.484 |
| Serum albumin (g/L) | 35.5 ± 7.6 | 38 ± 7.2 | 33.1 ± 7.2 | <0.001 |
| Glycosylated hemoglobin(%) | 7.1 [6.1, 8.5] | 7.1 [6.3, 8.5] | 7.0 [5.7, 8.4] | 0.229 |
| Cystatin-C (mg//L) | 1.5 [1.16, 1.9] | 1.41 [1.12, 1.89] | 1.56 [1.21, 1.94] | 0.141 |
| Serum creatinine (μmol/L) | 121 [87, 156] | 121 [87, 155] | 119 [86, 158] | 0.909 |
| eGFR (mL/min/1.73 m2) | 58 [43, 90] | 57 [43, 92] | 58 [43，90] | 0.977 |
| Albumin to creatinine ratio | 2407 [1187, 4750] | 2169 [1002,4359] | 2648 [1227, 4956] | 0.580 |
| (mg/g) | (n=106) | (n=53) | (n=53) |  |
| Proteinuria (g/24 h) | 3.7 [1.7, 6.8] | 2.7 [0.9, 5.2] | 4.8 [2.6, 8.4] | <0.001 |
| Proteinuria subgroups, n (%) |  |  |  | <0.001 |
| 0-3.5 | 90 (47.1) | 55 (57.9) | 35 (36.5) |  |
| >3.5 | 101 (52.9) | 40 (42.1) | 61 (63.5) |  |
| Triglyceride (mmol/L) | 1.78 [1.33, 2.31] | 1.72 [1.33, 2.39] | 1.80 [1.24, 2.26] | 0.831 |
| Total cholesterol (mmol/L) | 5.11 ± 1.58 | 4.87 ± 1.55 | 5.34 ± 1.59 | 0.04 |
| HDL-C(mmol/L) | 1.19 [0.99, 1.53] | 1.17 [0.96, 1.42] | 1.3 [1.01, 1.62] | 0.07 |
| LDL-C(mmol/L) | 2.87 [2.2, 3.64] | 2.71 [2.04, 3.26] | 3.07 [2.26, 4.05] | 0.03 |
| Uric acid (mmol/L) | 390 ± 84 | 403 ± 87 | 378 ± 80 | 0.04 |
| Hemoglobin (g/L) | 121 ± 27 | 128 ± 27 | 114 ± 26 | <0.001 |
| eGFR slope  (mL/min/1.73 m2/year) | -8.0 [-17.6, -2.5] | -2.5 [-5.0, 0.5] | -17.1 [-27.2, -11.3] | <0.001 |
| Stage 1, 2, 3, 4 CKD (KDIGO), *n* | 47/42/84/17 | 23/22/43/6 | 24/20/41/11 | 0.656 |
| Use of RAAS inhibitors, *n* (%) | 151 (79.1) | 74 (77.9) | 77 (80.2) | 0.694 |
| Insulin use, *n* (%) | 156 (81.7) | 77 (81.1) | 79 (82.3) | 0.825 |
| Statins use, *n* (%) | 109 (57.7) | 54 (58.1) | 55（57.3） | 0.914 |
| Follow-up duration (months) | 29 [21, 43] | 38 [26, 50] | 25 [20, 30] | <0.001 |

Data are presented as a mean ± SD, or median [IQR], or count (percentage). A two-tailed *p*< 0.05 was considered statistically significant.

*ESRD* end-stage renal disease, *eGFR* estimated glomerular filtration rate, *HDL-C* high-density lipoprotein-cholesterol, *LDL-C* low-density lipoprotein-cholesterol, *RAAS* renin-angiotensin-aldosterone system.

Supplementary Table 2 Baseline clinical features of slow eGFR decliners

| Variables | All | non-ESRD | ESRD | *p-*value |
| --- | --- | --- | --- | --- |
|  | (n = 95) | (n = 71) | (n = 24) |  |
| Male gender, *n* (%) | 67 (70.5) | 53 (74.6) | 14 (58.3) | 0.13 |
| Age (years) | 52.5 ± 9.7 | 52.8 ± 9.7 | 51.5 ± 10.0 | 0.577 |
| Body mass index (kg/m2) | 25.92 ± 3.52 | 26.05 ± 3.04 | 25.54 ± 4.74 | 0.537 |
| Current Smoker, *n* (%) | 51 (53.7) | 42 (59.2) | 9 (37.5) | 0.066 |
| Hypertension, *n* (%) | 78 (82.1) | 58 (81.7) | 20 (83.3) | 0.856 |
| Systolic blood pressure (mmHg) | 145 ± 24 | 144 ± 24 | 148 ± 25 | 0.538 |
| Diastolic blood pressure (mmHg) | 86 ± 13 | 86 ± 13 | 86 ± 12 | 0.953 |
| Diabetic duration (months) | 84 [36, 132] | 96 [36, 156] | 54 [14, 128] | 0.043 |
| Diabetic retinopathy, *n* (%) | 46 (49.5) | 35 (50) | 11 (47.8) | 0.856 |
| Fasting blood glucose (mmol/L) | 6.6 [5.6 , 9.1] | 6.9 [5.6, 9.4] | 6.0 [5.2, 7.1] | 0.153 |
| Serum albumin (g/L) | 38 ± 7.2 | 39.2 ± 6.5 | 34.3 ± 8.1 | 0.003 |
| Glycosylated hemoglobin(%) | 7.1 [6.3, 8.5] | 7.2 [6.4, 8.2] | 7 [6, 8.8] | 0.607 |
| Cystatin-C (mg//L) | 1.41 [1.12, 1.89] | 1.3 [1.02, 1.66] | 1.8 [1.42, 2.43] | <0.001 |
| Serum creatinine (μmol/L) | 121 [87, 155] | 115 [79, 148] | 146 [119, 218] | 0.003 |
| eGFR (mL/min/1.73 m2) | 57 [43, 92] | 63 [43, 94] | 48 [34, 60] | 0.005 |
| Albumin to creatinine ratio | 2169 [1002, 4359] | 1585 [988, 4173] | 4263 [3221, 7108] | 0.013 |
| (mg/g) | (n=53) | (n=46) | (n=7) |  |
| Proteinuria (g/24 h) | 2.7 [0.9, 5.2] | 2.2 [0.7, 4.8] | 3.81 [2.2, 5.4] | 0.038 |
| Proteinuria subgroups, n (%) |  |  |  | 0.005 |
| 0-3.5 | 55 (57.9) | 47 (66.2) | 8 (33.3) |  |
| >3.5 | 40 (42.1) | 24 (33.8) | 16 (66.7) |  |
| Triglyceride (mmol/L) | 1.72 [1.33, 2.39] | 1.83 [1.33, 2.66] | 1.6 [1.28, 2.24] | 0.346 |
| Total cholesterol (mmol/L) | 4.87 ± 1.55 | 4.91 ± 1.71 | 4.74 ± 0.9 | 0.644 |
| HDL-C(mmol/L) | 1.17 [0.96, 1.42] | 1.14 [0.91, 1.4] | 1.24 [1.05, 1.45] | 0.161 |
| LDL-C(mmol/L) | 2.71 [2.04, 3.26] | 2.71 [2.04, 3.26] | 2.71 [1.98, 3.34] | 0.817 |
| Uric acid (mmol/L) | 403 ± 87 | 405 ± 92 | 396 ± 70 | 0.663 |
| Hemoglobin (g/L) | 128 ± 27 | 133 ± 25 | 112 ± 25 | <0.001 |
| Stage 1, 2, 3, 4 CKD (KDIGO), *n* | 23/22/43/6 | 21/18/30/1 | 2/4/13/5 | 0.002 |
| Use of RAAS inhibitors , *n* (%) | 74 (77.9) | 60 (84.5) | 14 (58.3) | 0.008 |
| Insulin use, *n* (%) | 77 (81.1) | 56 (78.9) | 21 (87.5) | 0.351 |
| Statins use, *n* (%) | 54 (58.1) | 41 (59.4) | 13 (54.2) | 0.653 |

Data are presented as a mean ± SD, or median [IQR], or count (percentage). A two-tailed *p*< 0.05 was considered statistically significant.

*ESRD* end-stage renal disease, *eGFR* estimated glomerular filtration rate, *HDL-C* high-density lipoprotein-cholesterol, *LDL-C* low-density lipoprotein-cholesterol,*RAAS*renin-angiotensin-aldosterone system.

Supplementary Table 3 Baseline pathological features of diabetic kidney disease patients

| Variables | All | Slow decliners | Rapid decliners | *p-*value |
| --- | --- | --- | --- | --- |
|  | (n = 191) | (n = 95) | (n = 96) |  |
| Glomerular class, *n* (%) |  |  |  | 0.02 |
| I | 14 (7.3) | 11 (11.6) | 3 (3.1) |  |
| IIa | 43 (22.5) | 26 (27.4) | 17 (17.7) |  |
| IIb | 19 (9.9) | 8 (8.4) | 11 (11.5) |  |
| III | 72 (37.7) | 27 (28.4) | 45 (46.9) |  |
| IV | 43 (22.5) | 23 (24.2) | 20 (20.8) |  |
| IFTA, *n* (%) |  |  |  | 0.419 |
| 0 | 7 (3.7) | 5 (5.3) | 2 (2.1) |  |
| 1 | 78 (40.8) | 39 (41.1) | 39 (40.6) |  |
| 2 | 82 (42.9) | 42 (44.2) | 40 (41.7) |  |
| 3 | 24 (12.6) | 9 (9.5) | 15 (15.6) |  |
| Interstitial inflammation, *n* (%) |  |  |  | 0.125 |
| 0 | 15 (7.9) | 10 (10.5) | 5 (5.2) |  |
| 1 | 134 (70.2) | 69 (72.6) | 65 (67.7） |  |
| 2 | 42 (22) | 16 (16.8) | 26 (27.1) |  |
| Arteriolar hyalinosis, *n* (%) |  |  |  | 0.64 |
| 0 | 22 (11.5) | 13 (13.7) | 9 (9.4) |  |
| 1 | 104 (54.5) | 50 (52.6) | 54 (56.3) |  |
| 2 | 65 (34) | 32 (33.7) | 33 (34.4) |  |
| Immunofluorescence features, *n* (%) |  |  |  |  |
| IgM | 32 (16.8) | 18 (18.9) | 14 (14.6) | 0.419 |
| IgA | 12 (6.3) | 4 (4.2) | 8 (8.3) | 0.24 |
| IgG | 27 (14.1) | 13 (13.7) | 14 (14.6) | 0.858 |
| C1q | 16 (8.4) | 9 (9.5) | 7 (7.3) | 0.586 |
| C3 | 27 (14.1) | 14 (14.7) | 13 (13.5) | 0.813 |
| C4 | 14 (7.3) | 6 (6.3) | 8 (8.3) | 0.593 |

Data are presented as percentages for categorical variables. A two-tailed *p*< 0.05 was considered statistically significant.

*IFTA* interstitial fibrosis and tubular atrophy, *C*3 complement 3, *C*4 complement 4.

Supplementary Table 4Baseline pathological features of slow eGFR decliners.

| Variables | All | non-ESRD | ESRD | *p-*value |
| --- | --- | --- | --- | --- |
|  | (n = 95) | (n = 71) | (n = 24) |  |
| Glomerular class, *n* (%) |  |  |  | <0.001 |
| I | 11 (11.6) | 11 (15.5) | 0 (0) |  |
| IIa | 26 (27.4) | 24 (33.8) | 2 (8.3) |  |
| IIb | 8 (8.4) | 6 (8.5) | 2 (8.3) |  |
| III | 27 (28.4) | 22 (31) | 5 (20.8) |  |
| IV | 23 (24.2) | 8 (11.3) | 15 (62.5) |  |
| IFTA, *n* (%) |  |  |  | 0.016 |
| 0 | 5 (5.3) | 5 (7) | 0 (0) |  |
| 1 | 39 (41.1) | 31 (43.7) | 8 (33.3) |  |
| 2 | 42 (44.2) | 32 (45.1) | 10 (41.7) |  |
| 3 | 9 (9.5) | 3 (4.2) | 6 (25) |  |
| Interstitial inflammation, *n* (%) |  |  |  | 0.032 |
| 0 | 10 (0.5) | 9 (12.7) | 1 (4.2) |  |
| 1 | 69 (72.6) | 54 (76.1) | 15 (62.5) |  |
| 2 | 16 (16.8) | 8 (11.3) | 8 (33.3) |  |
| Arteriolar hyalinosis, *n* (%) |  |  |  | 0.032 |
| 0 | 13 (13.7) | 12 (16.9) | 1 (4.2) |  |
| 1 | 50 (52.6) | 40 (56.3) | 10 (41.7) |  |
| 2 | 32 (33.7) | 19 (26.8) | 13 (54.2) |  |
| Immunofluorescence features, *n* (%) |  |  |  |  |
| IgM | 18 (18.9) | 11 (15.5) | 7 (29.2) | 0.139 |
| IgA | 4 (4.2) | 3 (4.2) | 1 (4.2) | 0.99 |
| IgG | 13 (13.7) | 9 (12.7) | 4 (16.7) | 0.623 |
| C1q | 9 (9.5) | 5 (7) | 4 (16.7) | 0.164 |
| C3 | 14 (14.7) | 10 (14.1) | 4 (16.7) | 0.758 |
| C4 | 6 (6.3) | 5 (7) | 1 (4.2)） | 0.617 |

Data are presented as percentages for categorical variables. A two-tailed *p*< 0.05 was considered statistically significant.

*IFTA* interstitial fibrosis and tubular atrophy, *C*3 complement 3, *C*4 complement 4.

Supplementary Table 5Univariable and multivariable Cox proportional hazard analyses for the prediction of ESRD in slow eGFR decliners

| Variables | Univariate HR (95% CI) | *p value* | Multivariable HR (95% CI) | *p* value |
| --- | --- | --- | --- | --- |
| Age | 0.992 (0.953, 1.032) | 0.688 | 0.993 (0.945, 1.044) | 0.788 |
| Male | 0.577 (0.252, 1.321) | 0.193 | 0.596 (0.195, 1.824) | 0.364 |
| eGFR | 0.955 (0.933, 0.977) | <0.001 | 0.973 (0.945, 1.001) | 0.062 |
| Proteinuria | 1.091 (1.010, 1.178) | 0.026 | 1.035 (0.901,1.189) | 0.629 |
| Serum albumin | 0.909 (0.865, 0.955) | <0.001 | 0.938 (0.856,1.028) | 0.169 |
| Hemoglobin | 0.961 (0.941, 0.981) | <0.001 | 0.978 (0.949, 1.009) | 0.158 |
| Hypertension | 1.639 (0.538, 4.992) | 0.385 |  |  |
| Glycosylated hemoglobin | 1.118 (0.873, 1.433) | 0.375 |  |  |
| Total cholesterol | 0.937 (0.676, 1.299) | 0.696 |  |  |
| LDL-C | 0.924 (0.623, 1.373) | 0.697 |  |  |
| **Pathology characteristics** | |  |  |  |
| Glomerular class | 5.336 (1.819,15.654) | 0.002 | 1.002 (0.225, 4.463) | 0.998 |
| IFTA | 3.477 (1.410, 8.578) | 0.007 | 0.835 (0.211, 3.295) | 0.796 |
| Interstitial inflammation | 5.665 (2.202, 14.574) | <0.001 | 4.598 (1.470, 14.378) | 0.009 |
| Arteriosclerosis | 2.029 (0.880, 4.677) | 0.097 | 1.816 (0.707, 4.663) | 0.215 |

Multivariable model was adjusted for age, sex, eGFR, proteinuria, serum albumin, hemoglobin, and all pathological parameters. *HR* hazard ratio, *eGFR* estimated glomerular filtration rate, *LDL-C* low-density lipoprotein-cholesterol, *IFTA* interstitial fibrosis and tubular atrophy.
